# Supplementary material for: Decreased Functional Connectivity of the Core Pain Matrix in Herpes Zoster and Postherpetic Neuralgia Patients
Source: MDPI journal article supplement (doi:10.3390/brainsci13101357), 2023-09-22
Supplement: s1 [file s1]

# supplementary materials

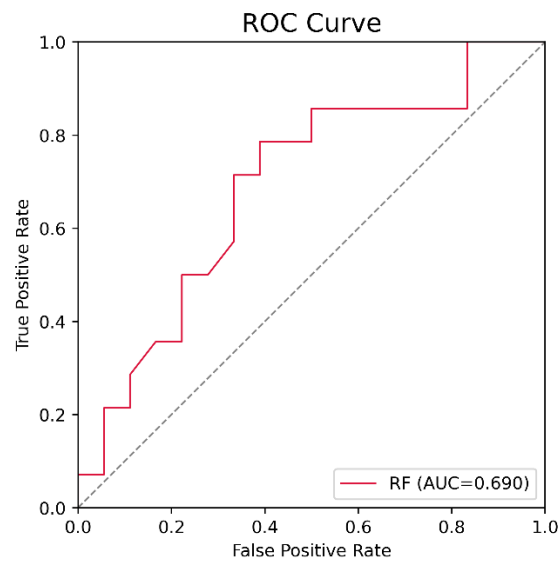

**Figure S1.** Receiver operating characteristic (ROC) curve of the random forest (RF) classifier used to distinguish patients with HZ and PHN.

**Table S1.** Functional connectivity feature importance in the random forest (RF) algorithm used to distinguish HZ and PHN patients

| Brain region   | Feature importance |
|----------------|--------------------|
| M1.L - IFG.R   | 0.156598           |
| THA.L - STG.L  | 0.128122           |
| ACC.L - DCG.L  | 0.081678           |
| INS.L - CPL    | 0.079729           |
| M1.R - INS.L   | 0.073820           |
| THA.L - PUT.R  | 0.056698           |
| ACC.R - PUT.R  | 0.050660           |
| M1.L - INS.L   | 0.048118           |
| INS.R - PCUN.L | 0.043700           |
| M1.R - S1.L    | 0.042467           |
| M1.R - S1.R    | 0.039940           |
| IPL.L - ITG.R  | 0.036231           |
| THA.R - ACC.R  | 0.030006           |
| INS.L - DCG    | 0.021296           |
| INS.L - MFG.L  | 0.021235           |
| THA.R - PUT.L  | 0.020425           |
| ACC.L - PUT.R  | 0.018853           |
| M1.R - PUT.R   | 0.014586           |
| THA.L - ACC.L  | 0.013286           |
| INS.R - MFG.L  | 0.009370           |
| INS.R - INS.L  | 0.006131           |
| M1.R - ITG.L   | 0.005354           |
| INS.R - SMA    | 0.001697           |

Abbreviations: R, right hemisphere; L, left hemisphere; M1, primary motor cortex; IFG, inferior frontal gyrus; THA, thalamus; STG, superior temporal gyrus; ACC, anterior cingulate gyrus; DCG, middle cingulate gyrus; INS, insula; CPL, posterior cerebellum lobe; PUT, putamen; PCUN, precuneus; S1, primary sensory cortex; IPL, inferior parietal lobule; ITG, inferior temporal gyrus; MFG, middle frontal gyrus; SMA, supplementary motor area.
